# Supplementary material
Source: bioRxiv or medRxiv preprint supplement (https://medrxiv.org/highwire/filestream/95794/field_highwire_adjunct_files/2/2020.09.04.20188169-3.pdf)

# Supplementary Figure 3

**a**

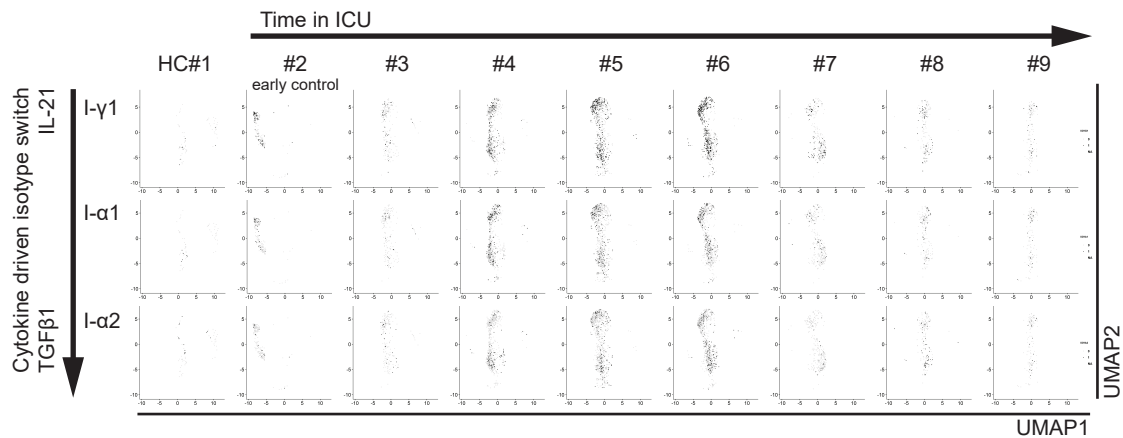

**b**

Active Allele

| COVID-19 | IGHA1 | IGHA2 | IGHG1 | IGHG2 | IGHG3 | IGHG4 | IGHD | IGHE | IGHM |
|----------|-------|-------|-------|-------|-------|-------|------|------|------|
| IGHA1    | 13    | 9     | 20    | 21    | 25    | 10    | 4    | 6    | 24   |
| IGHA2    | 18    | 15    | 5     | 34    | 8     | 5     | 2    | 0    | 6    |
| IGHG1    | 29    | 22    | 19    | 7     | 10    | 24    | 22   | 0    | 34   |
| IGHG2    | 7     | 21    | 6     | 12    | 2     | 4     | 12   | 0    | 4    |
| IGHG3    | 6     | 3     | 1     | 1     | 9     | 35    | 12   | 0    | 2    |
| IGHG4    | 0     | 6     | 0     | 0     | 0     | 6     | 2    | 0    | 1    |
| IGHD     | 0     | 0     | 0     | 1     | 0     | 0     | 0    | 0    | 0    |
| IGHE     | 0     | 0     | 0     | 0     | 0     | 0     | 0    | 0    | 0    |
| IGHM     | 27    | 23    | 48    | 24    | 35    | 4     | 23   | 6    | 30   |

Inactive Allele

**d**

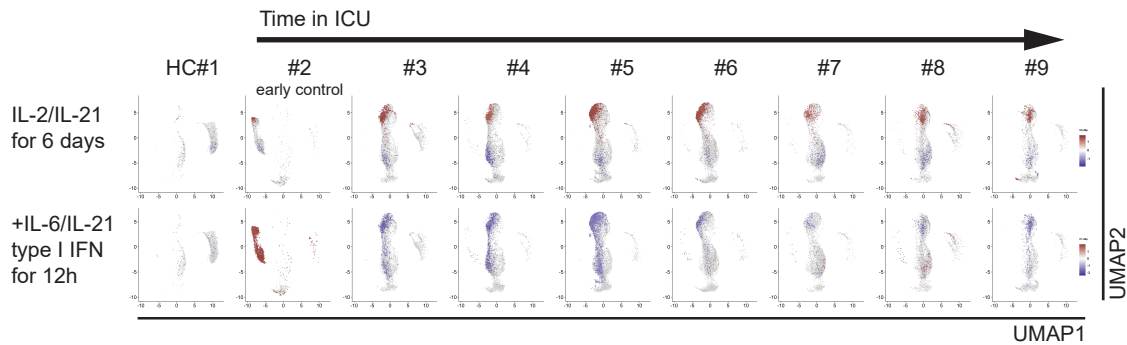

Supplement: Supplementary file [file 2020.09.04.20188169-3.pdf]
